# Supplementary material
Source: PubMed Central journal article supplement (PMC5314432)
Supplement: NIHMS842299-supplement-01.pdf [file NIHMS842299-supplement-01.pdf]

## **Supplementary Tables and Figures**

Table S1. Demographics by Biotype

Table S2. Concomitant Medications

Table S3. PCA Loadings

Table S4. TwoStep Cluster Results

Table S5. Discriminant Function Loadings for Cognitive Control and Sensorimotor Reactivity

Table S6. Jackknife Classification Results

Table S7. Clinical Characteristics by DSM Diagnosis

Table S8. Regions of Gray Matter Volume Reduction in Probands and Relatives

Figure S1. Biotype Creation Flow Diagram

Figure S2. Gap Statistic Results

Figure S3. Biotypes versus DSM Scatter

Figure S4. Relatives by Diagnosis on Cognitive Control and Sensorimotor Reactivity

Supplementary Table 1. Demographics

|                                  | Proband by Biotype |                |                | Relatives by Proband Biotype |                |                | Healthy<br>(n=279) |
|----------------------------------|--------------------|----------------|----------------|------------------------------|----------------|----------------|--------------------|
|                                  | 1<br>(n=198)       | 2<br>(n=235)   | 3<br>(n=278)   | 1<br>(n=228)                 | 2<br>(n=277)   | 3<br>(n=359)   |                    |
| <b>Age mean (SD)</b>             | 37.4<br>(13.5)     | 35.8<br>(11.8) | 35.2<br>(12.4) | 40.1<br>(15.3)               | 41.0<br>(15.8) | 42.0<br>(15.9) | 36.5<br>(12.7)     |
| <b>Female %</b>                  | 47.5               | 51.9           | 46.8           | 64.0                         | 67.9           | 67.4           | 53.8               |
| <b>Hispanic %</b>                | 11.1               | 9.4            | 5.4            | 13.6                         | 8.7            | 6.1            | 8.5                |
| <b>Race %</b>                    |                    |                |                |                              |                |                |                    |
| African American                 | 50.5               | 32.3           | 28.1           | 48.7                         | 28.2           | 22.0           | 28.8               |
| Native American                  | 0.5                | 0.0            | 0.0            | 1.3                          | 0.0            | 0.0            | 0.7                |
| Asian                            | 1.0                | 3.4            | 1.8            | 0.4                          | 2.2            | 1.4            | 5.5                |
| White                            | 42.4               | 60.            | 65.1           | 46.1                         | 67.5           | 71.6           | 61.7               |
| Mixed                            | 3.0                | 1.3            | 3.6            | 0.9                          | 1.1            | 2.5            | 1.3                |
| Other                            | 2.5                | 2.1            | 1.4            | 2.6                          | 1.1            | 2.5            | 2.0                |
| Native Hawaiian                  | 0.0                | 0.0            | 0.0            | 0.0                          | 0.0            | 0.0            | 0.2                |
| <b>Marital Status %</b>          |                    |                |                |                              |                |                |                    |
| Never married                    | 70.2               | 66.4           | 66.2           | 46.5                         | 41.5           | 39.8           | 54.9               |
| Ever married                     | 29.3               | 33.2           | 33.8           | 51.8                         | 56.7           | 59.1           | 40.5               |
| Unknown                          | 0.5                | 0.4            | 0.0            | 1.8                          | 1.8            | 1.1            | 4.6                |
| <b>Education years mean (SD)</b> | 12.3<br>(2.1)      | 13.0<br>(2.3)  | 14.0<br>(2.7)  | 13.5<br>(2.7)                | 13.8<br>(2.5)  | 14.6<br>(2.7)  | 14.8<br>(2.5)      |
| <b>Hollingshead % (Family)</b>   |                    |                |                |                              |                |                |                    |
| Class I                          | 4.0                | 5.1            | 6.1            | 3.1                          | 2.9            | 7.0            | 6.5                |
| Class II                         | 15.2               | 23.0           | 31.7           | 11.0                         | 20.2           | 25.6           | 21.1               |
| Class III                        | 26.8               | 28.1           | 29.1           | 31.1                         | 30.3           | 29.5           | 34.0               |
| Class IV                         | 24.2               | 20.4           | 19.1           | 27.6                         | 25.3           | 23.1           | 20.5               |
| Class V                          | 13.1               | 11.1           | 5.4            | 11.8                         | 10.1           | 5.6            | 5.2                |
| Unknown                          | 16.7               | 12.3           | 8.6            | 15.4                         | 11.2           | 9.2            | 12.6               |
| <b>Handedness</b>                |                    |                |                |                              |                |                |                    |
| Left                             | 14.7               | 11.1           | 12.6           | 13.2                         | 10.1           | 8.6            | 9.6                |
| Right                            | 81.3               | 86.4           | 84.2           | 83.3                         | 86.3           | 89.1           | 82.6               |
| Both                             | 2.5                | 1.3            | 2.2            | 1.8                          | 1.8            | 0.8            | 1.3                |
| Unknown                          | 1.5                | 1.3            | 1.1            | 1.8                          | 1.8            | 1.4            | 6.5                |

Supplementary Table 2. Concomitant Medications

| Medication status, n (%)                           | Proband by Biotype |               |               | Relatives by Proband Biotype |               |               |
|----------------------------------------------------|--------------------|---------------|---------------|------------------------------|---------------|---------------|
|                                                    | 1<br>(n=194)       | 2<br>(n=235)  | 3<br>(n=275)  | 1<br>(n=218)                 | 2<br>(n=273)  | 3<br>(n=348)  |
| <b>Off Any Medication</b>                          | 0<br>(0.0)         | 9<br>(3.8)    | 10<br>(3.6)   | 66<br>(30.3)                 | 82<br>(30.0)  | 95<br>(27.3)  |
| <b>Off Psychotropic Medications</b>                | 2<br>(1.0)         | 15<br>(6.4)   | 22<br>(8.0)   | 153<br>(70.2)                | 193<br>(70.7) | 245<br>(70.4) |
| <b>On &gt;1 Psychotropic Medication</b>            | 165<br>(85.1)      | 182<br>(77.5) | 199<br>(72.4) | 39<br>(17.9)                 | 42<br>(15.4)  | 44<br>(12.6)  |
| <b>Antipsychotics (Any)</b>                        | 181<br>(93.3)      | 203<br>(86.4) | 217<br>(78.9) | 28<br>(12.8)                 | 25<br>(9.2)   | 26<br>(7.5)   |
| First Generation                                   | 30<br>(15.5)       | 17<br>(7.2)   | 23<br>(8.4)   | 3<br>(1.4)                   | 4<br>(1.5)    | 1<br>(0.3)    |
| Second Generation                                  | 151<br>(77.8)      | 185<br>(78.7) | 194<br>(70.6) | 25<br>(11.5)                 | 21<br>(7.7)   | 25<br>(7.2)   |
| <b>Mood Stabilizers (Any)</b>                      | 84<br>(43.3)       | 104<br>(44.3) | 131<br>(47.6) | 20<br>(9.2)                  | 21<br>(7.7)   | 22<br>(6.3)   |
| Lithium                                            | 19<br>(9.8)        | 31<br>(13.2)  | 41<br>(14.9)  | 3<br>(1.4)                   | 7<br>(2.6)    | 6<br>(1.7)    |
| Anticonvulsants                                    | 65<br>(33.5)       | 73<br>(31.1)  | 90<br>(32.7)  | 17<br>(7.8)                  | 14<br>(5.1)   | 16<br>(4.6)   |
| <b>Antidepressants (Any)</b>                       | 85<br>(43.8)       | 108<br>(46.0) | 125<br>(45.5) | 37<br>(17.0)                 | 56<br>(20.5)  | 69<br>(19.8)  |
| SSRIs, SNRIs                                       | 53<br>(27.3)       | 65<br>(27.7)  | 71<br>(25.8)  | 29<br>(13.3)                 | 41<br>(15.0)  | 49<br>(14.1)  |
| Tricyclic                                          | 1<br>(0.5)         | 8<br>(3.4)    | 3<br>(1.1)    | 2<br>(0.9)                   | 2<br>(0.7)    | 2<br>(0.6)    |
| MAO Inhibitors                                     | 0<br>(0.0)         | 0<br>(0.0)    | 0<br>(0.0)    | 0<br>(0.0)                   | 0<br>(0.0)    | 0<br>(0.0)    |
| Miscellaneous                                      | 31<br>(16.0)       | 35<br>(14.9)  | 51<br>(18.6)  | 6<br>(2.8)                   | 13<br>(4.8)   | 18<br>(5.2)   |
| <b>Anxiolytics/Sedatives/Hypnotics</b>             | 57<br>(29.4)       | 66<br>(28.1)  | 67<br>(24.4)  | 17<br>(7.8)                  | 23<br>(8.4)   | 38<br>(10.9)  |
| <b>Anticholinergic/Antiparkinsonian</b>            | 46<br>(23.7)       | 23<br>(9.8)   | 33<br>(12.0)  | 4<br>(1.8)                   | 3<br>(1.1)    | 2<br>(0.6)    |
| <b>Stimulants</b>                                  | 12<br>(6.2)        | 10<br>(4.3)   | 25<br>(9.1)   | 9<br>(4.1)                   | 7<br>(2.6)    | 7<br>(2.0)    |
| <b>Miscellaneous Psychotropic/Centrally Active</b> | 2<br>(1.0)         | 8<br>(3.4)    | 7<br>(2.6)    | 3<br>(1.4)                   | 5<br>(1.8)    | 3<br>(0.9)    |

Concomitant medication data are presented based on subjects' reports and available clinical information. Missing concomitant medication data, (n) %: Proband: Biotype 1, 4 (2.0); Biotype 3, 3 (1.1); Relatives: Biotype 1, 10 (4.4); Biotype 2, 4 (1.4); Biotype 3, 11 (3.1)

**Supplementary Table 3. PCA Loadings**

| <b>ERP Variables Pattern Matrix</b>     |              |              |                  |                  |             |
|-----------------------------------------|--------------|--------------|------------------|------------------|-------------|
|                                         | Component    |              |                  |                  |             |
|                                         | <b>N100</b>  | <b>P300</b>  | <b>Paired S2</b> | <b>Intrinsic</b> | <b>P200</b> |
| Paired Stimuli - S1 (N100 ERP)          | <b>-.819</b> | .186         | .247             | .033             | .015        |
| Oddball - Targets2 (N100 ERP)           | <b>-.801</b> | -.174        | -.154            | .122             | .258        |
| Oddball - Standards (N100 ERP)          | <b>-.779</b> | -.200        | -.086            | .080             | .293        |
| Paired Stimuli – S1 (low early latency) | <b>.717</b>  | -.148        | -.179            | .135             | .243        |
| Oddball - Targets1 (low 20-100ms)       | <b>.669</b>  | .253         | .070             | .078             | -.131       |
| Oddball - Standards (beta 20-100ms)     | <b>.530</b>  | .170         | .054             | .336             | -.002       |
| Oddball - Standards (low 30-480ms)      | <b>.449</b>  | .430         | .053             | .118             | .169        |
| Oddball - Targets2 (low 140-280ms)      | -.016        | <b>.838</b>  | -.014            | -.076            | .085        |
| Oddball - Targets2 (low 280-400ms)      | .029         | <b>.784</b>  | -.077            | -.098            | .071        |
| Oddball - Targets1 (P3a ERP)            | .000         | <b>-.679</b> | .063             | .030             | .042        |
| Oddball - Targets1 (low 190-440ms)      | .166         | <b>.652</b>  | .040             | -.024            | .037        |
| Oddball - Targets2 (beta 180-240ms)     | -.021        | <b>.544</b>  | -.048            | .324             | -.003       |
| Oddball - Targets1 (beta 140-230ms)     | .070         | <b>.488</b>  | -.001            | .338             | .054        |
| Paired Stimuli - S2 (late ERP)          | .058         | -.019        | <b>.831</b>      | -.053            | .132        |
| Paired Stimuli - preS2                  | -.113        | -.083        | <b>.723</b>      | .104             | -.199       |
| Paired Stimuli - S2 (P50 ERP)           | -.157        | -.076        | <b>.698</b>      | .294             | -.062       |
| Paired Stimuli - S2 (P200 ERP)          | .101         | -.047        | <b>.687</b>      | -.144            | .375        |
| Paired Stimuli - S2 (N100 ERP)          | -.073        | -.036        | <b>.653</b>      | .116             | .426        |
| Paired Stimuli - S1 (N200 ERP)          | .027         | .064         | <b>.576</b>      | -.099            | -.014       |
| Oddball - Standards (gamma 480-520ms)   | -.086        | .007         | .121             | <b>.666</b>      | -.147       |
| Paired Stimuli – S2 (beta late)         | -.021        | .011         | -.010            | <b>.615</b>      | -.001       |
| Paired Stimuli - preS1 (gamma)          | -.069        | -.127        | .055             | <b>.566</b>      | -.169       |
| Oddball – Targets2 (gamma 20-70ms)      | .129         | .071         | -.025            | <b>.515</b>      | .035        |
| Oddball – Standards (beta 30-70ms)      | .211         | .100         | .061             | <b>.497</b>      | .065        |
| Oddball – Standards (beta 230-270ms)    | .077         | .324         | -.065            | <b>.454</b>      | .105        |
| Paired Stimuli – S1 (beta early)        | .424         | -.111        | -.110            | <b>.450</b>      | .174        |
| Oddball – Standards (P200 ERP)          | .013         | .118         | .176             | -.026            | <b>.754</b> |
| Oddball – Targets2 (P200 ERP)           | -.445        | -.094        | -.013            | .103             | <b>.685</b> |
| Paired Stimuli - S1 (P200 ERP)          | .410         | -.075        | .248             | -.245            | <b>.597</b> |
| Oddball Targets2 (N200 ERP)             | -.357        | .416         | -.060            | -.115            | <b>.575</b> |
| Paired Stimuli – S1 (low midlatency)    | .376         | -.020        | -.257            | .077             | <b>.433</b> |

| <b>Stop Signal Task Pattern Matrix</b> |                         |
|----------------------------------------|-------------------------|
|                                        | <b>Stop Signal Task</b> |
| Proportion Errors                      | -.860                   |
| Go RT Difference                       | .860                    |

| <b>Saccade Tasks Pattern Matrix</b> |                        |                           |
|-------------------------------------|------------------------|---------------------------|
|                                     | Component              |                           |
|                                     | <b>Saccade Latency</b> | <b>Antisaccade Errors</b> |
| Antisaccade Error Rate              | -.076                  | <b>.969</b>               |
| Antisaccade Error Latency           | <b>.663</b>            | <b>-.423</b>              |
| Prosaccade No Gap Latency           | <b>.894</b>            | -.035                     |
| Prosaccade Gap Latency              | <b>.880</b>            | -.062                     |
| Prosaccade Overlap Latency          | <b>.856</b>            | -.147                     |

Supplementary Table 4: TwoStep Cluster Results for Determining Number of Clusters. Red shows the solution with the lowest Schwarz's Bayesian Information Criterion (BIC) and the greatest separation between clusters (3 cluster row).

| Number of Clusters | (BIC)           | BIC Change <sup>a</sup> | Ratio of BIC Changes <sup>b</sup> | Ratio of Distance Measures <sup>c</sup> |
|--------------------|-----------------|-------------------------|-----------------------------------|-----------------------------------------|
| 1                  | 2303.222        |                         |                                   |                                         |
| 2                  | 2230.353        | -72.868                 | 1.000                             | 1.286                                   |
| <b>3</b>           | <b>2197.199</b> | <b>-33.155</b>          | <b>.455</b>                       | <b>1.533</b>                            |
| 4                  | 2212.269        | 15.071                  | -.207                             | 1.373                                   |
| 5                  | 2251.915        | 39.646                  | -.544                             | 1.062                                   |
| 6                  | 2295.391        | 43.476                  | -.597                             | 1.507                                   |
| 7                  | 2359.771        | 64.379                  | -.883                             | 1.018                                   |
| 8                  | 2424.884        | 65.114                  | -.894                             | 1.062                                   |
| 9                  | 2492.359        | 67.474                  | -.926                             | 1.007                                   |
| 10                 | 2560.107        | 67.748                  | -.930                             | 1.117                                   |

- a. Changes are from the previous number of clusters.
- b. Ratios of changes are relative to the two-cluster solution.
- c. Ratios of distance measures are based on the current number of clusters against the previous number of clusters.

| <b>Biomarker Composite Loadings on Discriminant Functions</b> |                          |                                |                           |                  |                  |
|---------------------------------------------------------------|--------------------------|--------------------------------|---------------------------|------------------|------------------|
|                                                               | Component                |                                | Three SZ Cases by Biotype |                  |                  |
| <b>Biomarker Composites</b>                                   | <b>Cognitive Control</b> | <b>Sensorimotor Reactivity</b> | <b>Biotype-1</b>          | <b>Biotype-2</b> | <b>Biotype-3</b> |
| BACS                                                          | <b>.82</b>               | .05                            | -3.3                      | -2.8             | -1.0             |
| Stop Signal Task                                              | <b>.33</b>               | .03                            | -2.0                      | 0.1              | 0.6              |
| Antisaccade Errors                                            | <b>-.24</b>              | .09                            | 3.8                       | 3.0              | 0.8              |
| EEG Intrinsic Activity                                        | -.01                     | <b>.69</b>                     | -0.8                      | 0.3              | -1.3             |
| ERP N100 Response                                             | .12                      | <b>.58</b>                     | -1.8                      | -0.8             | -0.2             |
| ERP Paired S2 Response                                        | .02                      | <b>-.48</b>                    | 1.2                       | -1.4             | 0.3              |
| ERP P300 Response                                             | .14                      | <b>.47</b>                     | -2.1                      | -0.5             | -0.1             |
| ERP P200 Response                                             | -.14                     | <b>.32</b>                     | -0.7                      | -0.6             | -0.9             |
| Saccade Latency                                               | -.18                     | <b>-.20</b>                    | 2.0                       | -1.2             | 0.4              |
|                                                               |                          |                                |                           |                  |                  |
| Cognitive Control                                             |                          |                                | -3.6                      | -2.0             | 1.2              |
| Sensorimotor Reactivity                                       |                          |                                | -2.2                      | 0.8              | -1.1             |

**Supplementary Table 5. Discriminant Function Loadings.** The loadings of the nine biomarker composite variables on the two discriminant functions are shown under the ‘Component’ column. Also displayed are three examples of schizophrenia (SZ) cases that fell into different Biotypes. The effect size differentiation on each of the biomarker composites for each case is shown. The bottom two rows show the ‘Cognitive Control’ and ‘Sensorimotor Reactivity’ values (in standard score units) for the three cases. These values can be translated to the bivariate scatter plots in Supplementary Figure 3. Brief Assessment of Cognition in Schizophrenia (BACS); Electroencephalography (EEG); Event-Related Potential (ERP).

**Predicted Biotype Membership**

| <b>Original Biotype Membership</b> | <b>1</b>     | <b>2</b>     | <b>3</b>     | <b>Total Cases</b> |
|------------------------------------|--------------|--------------|--------------|--------------------|
| <b>1</b>                           | 170<br>(86%) | 23<br>(12%)  | 5<br>(2%)    | 198<br>(100%)      |
| <b>2</b>                           | 10<br>(4%)   | 213<br>(91%) | 12<br>(5%)   | 235<br>(100%)      |
| <b>3</b>                           | 3<br>(1%)    | 11<br>(4%)   | 264<br>(95%) | 278<br>(100%)      |

**Predicted DSM Diagnosis Membership**

| <b>Original DSM Dx Membership</b> | <b>SZ</b>    | <b>SZAff</b> | <b>BDP</b>   | <b>Total Cases</b> |
|-----------------------------------|--------------|--------------|--------------|--------------------|
| <b>SZ</b>                         | 162<br>(52%) | 79<br>(25%)  | 71<br>(23%)  | 312<br>(100%)      |
| <b>SZAff</b>                      | 72<br>(41%)  | 46<br>(27%)  | 55<br>(32%)  | 173<br>(100%)      |
| <b>BDP</b>                        | 54<br>(24%)  | 61<br>(27%)  | 111<br>(49%) | 226<br>(100%)      |

Supplementary Table 6. Jackknife Results. Schizophrenia (SZ); Schizoaffective (SZAff); Bipolar Disorder with Psychosis (BDP).

Supplementary Table 7. Clinical Characteristics by DSM. Schizophrenia (SZ); Schizoaffective (SZAff); Bipolar Disorder with Psychosis (BDP)

| Clinical Characteristics                                                                        | DSM Diagnosis   |                 |                 | Statistics               |         |                     |
|-------------------------------------------------------------------------------------------------|-----------------|-----------------|-----------------|--------------------------|---------|---------------------|
|                                                                                                 | SZ              | SZAff           | BDP             | (df)                     | Value   | p                   |
| <b>Probands Biotype, (%)</b>                                                                    |                 |                 |                 |                          |         |                     |
| 1                                                                                               | 58.6            | 21.2            | 20.2            | $\chi^2(2)$              | 25.95   | <.001 <sup>a</sup>  |
| 2                                                                                               | 46.0            | 26.8            | 27.2            | $\chi^2(2)$              | 3.50    | .17                 |
| 3                                                                                               | 31.7            | 24.5            | 43.9            | $\chi^2(2)$              | 36.46   | <.001 <sup>b</sup>  |
| <b>Schizo-Bipolar Scale, mean (SD)</b>                                                          |                 |                 |                 |                          |         |                     |
|                                                                                                 | 7.9<br>(1.2)    | 5.1<br>(1.5)    | 1.1<br>(1.1)    | F(2,687)                 | 1943.63 | p<.001 <sup>c</sup> |
| <b>Probands Clinical Symptom Ratings, mean (SD)</b>                                             |                 |                 |                 |                          |         |                     |
| PANSS Positive Subscale                                                                         | 16.7<br>(5.8)   | 17.9<br>(5.2)   | 12.9<br>(3.9)   | F(2,692)                 | 51.71   | <.001 <sup>d</sup>  |
| PANSS Negative Subscale                                                                         | 16.7<br>(6.0)   | 15.8<br>(5.0)   | 12.0<br>(3.9)   | F(2,692)                 | 56.92   | <.001 <sup>e</sup>  |
| MADRS                                                                                           | 8.2<br>(7.9)    | 14.7<br>(10.3)  | 10.2<br>(9.3)   | F(2,687)                 | 28.70   | <.001 <sup>f</sup>  |
| Young Mania Rating Scale                                                                        | 5.5<br>(5.8)    | 7.1<br>(6.5)    | 5.8<br>(6.7)    | F(2,688)                 | 3.60    | .03 <sup>g</sup>    |
| <b>Birchwood Social Functioning Scale, mean (SD)</b><br><b>(Healthy, Mean = 154.8; SD=17.8)</b> |                 |                 |                 |                          |         |                     |
| Probands                                                                                        | 120.8<br>(24.4) | 118.4<br>(25.1) | 134.3<br>(22.6) | F(3,885)                 | 120.30  | <.001 <sup>h</sup>  |
| Relatives                                                                                       | 147.0<br>(21.4) | 141.8<br>(23.4) | 150.3<br>(21.6) | F(3,979)                 | 17.31   | <.001 <sup>i</sup>  |
| <b>Relatives Diagnoses, (%)</b>                                                                 |                 |                 |                 |                          |         |                     |
| Axis I Psychosis                                                                                | 11.5            | 14.8            | 8.6             | $\chi^2(2)$              | 4.73    | .09                 |
| Axis II: Cluster A and/or B Personality Disorders                                               | 9.9             | 11.7            | 10.0            | $\chi^2(2)$              | 0.62    | .73                 |
| Psychosis-Related Diagnoses (Axis I Psychosis + Axis II/Cluster A,B, combined)*                 | 21.1            | 25.7            | 18.3            | $\chi^2(2)$ <sup>h</sup> | 4.10    | .13                 |

\*Axis I Psychosis and % Axis II/Cluster A, B combined % do not exactly sum to % Psychosis and Psychosis-Related illnesses because some relatives have both Axis I Psychosis and Axis II/Cluster A, B. In such cases they are counted once.

<sup>a</sup>Yates Corrected pair-wise chi square: SZ>SZAff,  $\chi^2(1)=7.86$ , p=.005; SZ>BDP,  $\chi^2(1)=23.22$ , p<.001

<sup>b</sup>Yates Corrected pair-wise chi square: BDP>SZ,  $\chi^2(1)=35.52$ , p<.001; BDP >SZAff,  $\chi^2(1)=7.88$ , p=.005; SZ>SZAff,  $\chi^2(1)=5.79$ , p=.02

<sup>c</sup>Tukey HSD: SZ>SZAff (p<.001) and BDP (p<.001); SZAff>BDP (p<.001)

<sup>d</sup>Tukey HSD: BDP<SZ (p<.001) and SZAff (p<.001); SZAff>SZ (p=.04)

<sup>e</sup>Tukey HSD: BDP<SZ (p<.001) and SZAff (p<.001)

<sup>f</sup>Tukey HSD: SZAff>SZ (p<.001) and BDP (p<.001); BDP > SZ (p=.03)

<sup>g</sup>Tukey HSD: SZAff>SZ (p=.02)

<sup>h</sup>Tukey HSD: SZ<BDP (p<.001) and Healthy (p<.001); SZAff<BDP (p<.001) and Healthy (p<.001); BDP<Healthy (p<.001)

<sup>i</sup>Tukey HSD: SZ<Healthy (p<.001); SZAff<BDP (p<.001) and Healthy (p<.001); BDP<Healthy (p=0.01)



**Supplementary Table 8. Regions of gray matter volume reduction in probands and relatives categorized by Biotype contrasted with healthy subjects**

| Group Comparison                                                                    | Brain Region            | Brodman Area         | Gray Matter Volume (Voxels) Left / Right | Maximum <i>t</i> (Talairach coordinates: x, y, z) Left / Right * | Effect size Left / Right †         |             |
|-------------------------------------------------------------------------------------|-------------------------|----------------------|------------------------------------------|------------------------------------------------------------------|------------------------------------|-------------|
| <b>Gray matter volume reductions in Biotype proband groups vs. healthy subjects</b> |                         |                      |                                          |                                                                  |                                    |             |
| <b>Healthy – Biotype1 Probands</b>                                                  | <i>Frontal</i>          |                      |                                          |                                                                  |                                    |             |
|                                                                                     | Inferior Frontal Gyrus  | 9, 10, 11, 13, 44,   | 6667 / 7081                              | 9.1 (-39, 25, -1) / 10.3 (42, 22, -4)                            | 0.94 / 1.06                        |             |
|                                                                                     | Middle Frontal Gyrus    | 6, 8, 9, 10, 11, 46, | 4830 / 6904                              | 9.4 (-30, 37, -13) / 10.0 (33, 33, -16)                          | 0.97 / 1.03                        |             |
|                                                                                     | Medial Frontal Gyrus    | 6, 8, 9, 10, 11, 25, | 6193 / 6133                              | 10.8 (-1, 33, -14) / 11.0 (1, 36, -13)                           | 1.11 / 1.13                        |             |
|                                                                                     | Superior Frontal Gyrus  | 6, 8, 9, 10, 11      | 5511 / 6015                              | 8.6 (-30, 42, -15) / 8.2 (12, 55, -9)                            | 0.89 / 0.85                        |             |
|                                                                                     | Precentral Gyrus        | 6, 9, 13, 43, 44     | 4593 / 4770                              | 7.8 (-42, 3, 7) / 8.3 (45, 5, 9)                                 | 0.81 / 0.86                        |             |
|                                                                                     | Paracentral Lobule      | 4, 5, 6, 31          | 593 / 800                                | 6.6 (-3, -11, 46) / 8.4 (6, -15, 44)                             | 0.68 / 0.87                        |             |
|                                                                                     | Rectal Gyrus            | 11                   | 237 / 148                                | 9.3 (-1, 33, -19) / 9.2 (3, 34, -21)                             | 0.96 / 0.95                        |             |
|                                                                                     | Orbital Gyrus           | 11, 47               | 148 / 89                                 | 8.9 (-3, 40, -20) / 8.6 (4, 44, -19)                             | 0.92 / 0.89                        |             |
|                                                                                     | <i>Cingulate</i>        |                      |                                          |                                                                  |                                    |             |
|                                                                                     | Cingulate Gyrus         | 23, 24, 31, 32       | 4800 / 4533                              | 8.9 (-3, 22, 28) / 9.8 (9, 8, 40)                                | 0.92 / 1.01                        |             |
|                                                                                     | Anterior Cingulate      | 10, 24, 25, 32, 33   | 2459 / 2578                              | 10.1 (-4, 39, -10) / 9.7 (3, 45, -6)                             | 1.04 / 1.00                        |             |
|                                                                                     | Posterior Cingulate     | 23, 29, 30, 31       | 1659 / 1244                              | 8.7 (-1, -60, 14) / 8.9 (4, -56, 17)                             | 0.90 / 0.92                        |             |
|                                                                                     | <i>Insula</i>           |                      |                                          |                                                                  |                                    |             |
|                                                                                     |                         |                      | 13, 22, 40, 41, 47                       | 3615 / 3437                                                      | 9.1 (-33, 20, 2) / 9.5 (36, 22, 2) | 0.94 / 0.98 |
|                                                                                     | <i>Temporal</i>         |                      |                                          |                                                                  |                                    |             |
|                                                                                     | Superior Temporal Gyrus | 13, 21, 22, 38, 39,  | 6756 / 6281                              | 8.7 (-33, 4, -13) / 8.3 (31, 7, -15)                             | 0.90 / 0.86                        |             |
|                                                                                     | Middle Temporal Gyrus   | 19, 20, 21, 22, 37,  | 5096 / 5570                              | 7.9 (-42, 5, -37) / 8.2 (58, 2, -18)                             | 0.82 / 0.85                        |             |
|                                                                                     | Parahippocampal Gyrus   | 19, 27, 28, 30, 34,  | 3378 / 3289                              | 9.5 (-27, -14, -21) / 8.9 (28, -16, -21)                         | 0.98 / 0.92                        |             |
|                                                                                     | Fusiform Gyrus          | 18, 19, 20, 36, 37   | 2163 / 2163                              | 7.1 (-25, -56, -9) / 7.1 (27, -50, -8)                           | 0.73 / 0.73                        |             |
|                                                                                     | Inferior Temporal Gyrus | 19, 20, 21, 37       | 1659 / 1689                              | 7.2 (-42, 0, -37) / 6.4 (42, 0, -35)                             | 0.74 / 0.66                        |             |
| Uncus                                                                               | 20, 28, 34, 36, 38      | 1037 / 1007          | 8.3 (-28, 2, -20) / 8.5 (33, 2, -19)     | 0.86 / 0.88                                                      |                                    |             |
| Transverse Temporal                                                                 | 41, 42                  | 444 / 267            | 8.0 (-48, -26, 12) / 8.5 (58, -20, 13)   | 0.83 / 0.88                                                      |                                    |             |

***Parietal***

|                          |                       |             |                                        |             |
|--------------------------|-----------------------|-------------|----------------------------------------|-------------|
| Precuneus                | 7, 18, 19, 23, 31     | 3822 / 4652 | 8.3 (-1, -59, 20) / 8.7 (4, -59, 20)   | 0.86 / 0.90 |
| Inferior Parietal Lobule | 7, 39, 40             | 1126 / 2696 | 6.7 (-59, -38, 24) / 7.4 (55, -27, 22) | 0.69 / 0.77 |
| Postcentral Gyrus        | 1, 2, 3, 5, 7, 40, 43 | 1333 / 1570 | 6.7 (-50, -25, 15) / 8.2 (58, -22, 16) | 0.69 / 0.85 |
| Supramarginal Gyrus      | 40                    | 89 / 978    | 4.4 (-53, -39, 30) / 5.6 (43, -46, 37) | 0.46 / 0.58 |
| Superior Parietal Lobule | 5, 7                  | 296 / 385   | 4.7 (-16, -61, 60) / 4.5 (24, -52, 58) | 0.49 / 0.47 |
| Angular Gyrus            | 39                    | 0 / 296     | - / 5.5 (48, -55, 36)                  | - / 0.57    |

***Occipital***

|                          |                    |             |                                        |             |
|--------------------------|--------------------|-------------|----------------------------------------|-------------|
| Cuneus                   | 7, 17, 18, 19, 23, | 3911 / 4119 | 7.5 (-9, -62, 7) / 8.0 (13, -62, 7)    | 0.76 / 0.83 |
| Lingual Gyrus            | 17, 18, 19         | 2815 / 2726 | 6.7 (-4, -79, 3) / 7.4 (16, -61, 4)    | 0.69 / 0.77 |
| Middle Occipital Gyrus   | 18, 19, 37         | 2370 / 2667 | 5.9 (-34, -84, 14) / 6.9 (24, -92, 20) | 0.61 / 0.71 |
| Inferior Occipital Gyrus | 17, 18, 19         | 504 / 652   | 5.3 (-28, -94, -8) / 6.1 (27, -86, -7) | 0.55 / 0.63 |
| Superior Occipital Gyrus | 19, 39             | 30 / 178    | 4.5 (-30, -88, 22) / 5.3 (33, -86, 24) | 0.47 / 0.55 |

***Basal Ganglia***

|                   |   |           |                                        |             |
|-------------------|---|-----------|----------------------------------------|-------------|
| Caudate           | * | 444 / 593 | 5.5 (-4, 10, -6) / 6.1 (4, 10, -4)     | 0.57 / 0.63 |
| Clastrum          | * | 326 / 296 | 8.0 (-28, 19, 2) / 7.8 (30, 19, -1)    | 0.83 / 0.81 |
| Lentiform Nucleus | * | 89 / 119  | 5.7 (-22, -12, -6) / 5.7 (30, -18, 13) | 0.59 / 0.59 |

***Thalamus***

|  |   |             |                                      |             |
|--|---|-------------|--------------------------------------|-------------|
|  | * | 1333 / 1304 | 6.3 (-7, -13, 10) / 5.5 (9, -15, 12) | 0.65 / 0.57 |
|--|---|-------------|--------------------------------------|-------------|

***Cerebellum***

|                     |   |             |                                          |             |
|---------------------|---|-------------|------------------------------------------|-------------|
| Culmen              | * | 2815 / 3437 | 6.9 (-19, -56, -20) / 7.0 (18, -27, -15) | 0.71 / 0.72 |
| Declive             | * | 1867 / 2756 | 6.8 (-13, -62, -18) / 6.1 (13, -59, -18) | 0.70 / 0.63 |
| Inferior Semi-Lunar | * | 830 / 1274  | 4.9 (-3, -63, -36) / 5.7 (16, -73, -42)  | 0.51 / 0.59 |
| Uvula               | * | 385 / 919   | 4.8 (-3, -66, -33) / 5.1 (33, -62, -23)  | 0.50 / 0.53 |
| Tuber               | * | 0 / 415     | - / 4.8 (31, -57, -27)                   | - / 0.50    |
| Pyramis             | * | 119 / 385   | 3.7 (-27, -60, -29) / 4.5 (27, -60, -27) | 0.38 / 0.47 |
| Cerebellar Tonsil   | * | 119 / 385   | 4.0 (-3, -57, -36) / 4.4 (7, -57, -41)   | 0.41 / 0.45 |
| Uvula of Vermis     | * | 119 / 89    | 5.0 (0, -69, -33) / 4.9 (3, -66, -33)    | 0.52 / 0.51 |
| Declive of Vermis   | * | 59 / 119    | 4.0 (-1, -72, -15) / 4.4 (1, -69, -15)   | 0.41 / 0.46 |
| Culmen of Vermis    | * | 89 / 89     | 5.7 (-3, -61, 2) / 5.9 (6, -61, 1)       | 0.59 / 0.61 |

|                   |   |         |                                        |             |
|-------------------|---|---------|----------------------------------------|-------------|
| Fastigium         | * | 59 / 59 | 5.5 (-9, -55, -19) / 5.5 (9, -56, -19) | 0.57 / 0.57 |
| Pyramis of Vermis | * | 30 / 30 | 3.7 (0, -71, -30) / 3.1 (3, -71, -28)  | 0.38 / 0.32 |

**Healthy –  
Biotype2  
Probands**

***Frontal***

|                        |                       |             |                                        |             |
|------------------------|-----------------------|-------------|----------------------------------------|-------------|
| Inferior Frontal Gyrus | 6, 9, 10, 11, 13, 25, | 5926 / 6193 | 8.2 (-39, 19, -2) / 8.5 (43, 19, -5)   | 0.80 / 0.83 |
| Superior Frontal Gyrus | 6, 8, 9, 10, 11       | 5600 / 5896 | 7.1 (-27, 52, -4) / 7.1 (10, 57, -1)   | 0.69 / 0.69 |
| Middle Frontal Gyrus   | 6, 8, 9, 10, 11, 46,  | 5096 / 5719 | 7.4 (-30, 36, -14) / 6.6 (33, 34, -16) | 0.72 / 0.64 |
| Medial Frontal Gyrus   | 6, 8, 9, 10, 11, 25,  | 5333 / 5570 | 8.2 (-12, 47, 16) / 7.5 (4, 55, 15)    | 0.80 / 0.73 |
| Precentral Gyrus       | 6, 9, 13, 42, 43, 44  | 2548 / 3585 | 6.9 (-46, -11, 9) / 7.5 (43, 3, 8)     | 0.67 / 0.73 |
| Paracentral Lobule     | 4, 5, 6, 31           | 296 / 533   | 4.9 (-7, -24, 43) / 6.6 (9, -18, 44)   | 0.48 / 0.64 |
| Rectal Gyrus           | 11                    | 237 / 148   | 5.8 (-4, 32, -21) / 5.5 (3, 24, -19)   | 0.56 / 0.53 |
| Orbital Gyrus          | 11                    | 148 / 119   | 7.4 (-4, 43, -21) / 5.9 (3, 51, -20)   | 0.72 / 0.57 |

***Cingulate***

|                     |                    |             |                                      |             |
|---------------------|--------------------|-------------|--------------------------------------|-------------|
| Cingulate Gyrus     | 23, 24, 31, 32     | 4030 / 4178 | 6.0 (-6, 23, 28) / 7.5 (9, -24, 37)  | 0.58 / 0.73 |
| Anterior Cingulate  | 10, 24, 25, 32, 33 | 2548 / 2193 | 7.6 (-9, 48, -2) / 7.2 (7, 45, -5)   | 0.74 / 0.70 |
| Posterior Cingulate | 23, 29, 30, 31     | 1659 / 1333 | 7.1 (-9, -58, 11) / 7.5 (10, -55, 8) | 0.69 / 0.73 |

***Insula***

|  |            |             |                                   |             |
|--|------------|-------------|-----------------------------------|-------------|
|  | 13, 22, 41 | 3467 / 3763 | 8.4 (-36, 18, 1) / 8.3 (43, 3, 3) | 0.82 / 0.81 |
|--|------------|-------------|-----------------------------------|-------------|

***Temporal***

|                         |                     |             |                                          |             |
|-------------------------|---------------------|-------------|------------------------------------------|-------------|
| Superior Temporal Gyrus | 13, 21, 22, 38, 39, | 6993 / 6311 | 8.2 (-55, -17, 9) / 8.1 (52, -1, 3)      | 0.80 / 0.79 |
| Middle Temporal Gyrus   | 19, 20, 21, 22, 37, | 5719 / 5630 | 7.3 (-56, -11, -10) / 6.9 (62, -35, 3)   | 0.71 / 0.67 |
| Parahippocampal Gyrus   | 19, 27, 28, 30, 34, | 3378 / 3259 | 6.8 (-24, -44, -10) / 6.5 (24, -48, -8)  | 0.67 / 0.63 |
| Fusiform Gyrus          | 18, 19, 20, 37      | 2607 / 1985 | 6.9 (-27, -54, -9) / 6.8 (24, -62, -8)   | 0.67 / 0.66 |
| Inferior Temporal Gyrus | 19, 20, 21, 37      | 1807 / 1600 | 5.8 (-39, 0, -37) / 5.7 (39, -19, -29)   | 0.56 / 0.55 |
| Uncus                   | 20, 28, 34, 36, 38  | 1037 / 948  | 6.4 (-34, -13, -28) / 6.2 (36, -16, -28) | 0.62 / 0.60 |
| Transverse Temporal     | 41, 42              | 385 / 356   | 8.4 (-55, -21, 11) / 7.9 (58, -21, 13)   | 0.82 / 0.77 |

***Parietal***

|                          |                   |             |                                        |             |
|--------------------------|-------------------|-------------|----------------------------------------|-------------|
| Precuneus                | 7, 19, 23, 31, 39 | 3141 / 3407 | 5.9 (0, -63, 24) / 6.8 (4, -59, 18)    | 0.57 / 0.66 |
| Postcentral Gyrus        | 2, 3, 40, 43      | 681 / 1393  | 6.3 (-61, -24, 14) / 7.1 (55, -24, 14) | 0.61 / 0.69 |
| Inferior Parietal Lobule | 7, 39, 40         | 1244 / 1807 | 7.0 (-58, -40, 24) / 6.3 (59, -27, 22) | 0.68 / 0.61 |

|                             |                    |             |                                          |             |
|-----------------------------|--------------------|-------------|------------------------------------------|-------------|
| Supramarginal Gyrus         | 40                 | 563 / 800   | 5.9 (-58, -41, 30) / 5.8 (58, -54, 29)   | 0.57 / 0.56 |
| Angular Gyrus               | 39                 | 237 / 356   | 3.8 (-48, -71, 33) / 5.8 (53, -61, 31)   | 0.37 / 0.56 |
| Superior Parietal Lobule    | 7                  | 59 / 296    | 3.4 (-39, -69, 45) / 5.3 (30, -68, 45)   | 0.33 / 0.51 |
| <b><i>Occipital</i></b>     |                    |             |                                          |             |
| Lingual Gyrus               | 17, 18, 19, 30     | 2578 / 2785 | 7.1 (-24, -72, -9) / 6.3 (13, -52, 3)    | 0.69 / 0.61 |
| Middle Occipital Gyrus      | 18, 19, 37         | 2133 / 2607 | 6.0 (-46, -66, -8) / 6.6 (31, -85, 19)   | 0.58 / 0.64 |
| Cuneus                      | 7, 17, 18, 19, 23, | 2193 / 2281 | 6.5 (-9, -61, 9) / 6.7 (12, -59, 8)      | 0.63 / 0.65 |
| Inferior Occipital Gyrus    | 17, 18, 19         | 504 / 711   | 5.4 (-42, -77, -5) / 6.2 (28, -85, -7)   | 0.52 / 0.60 |
| Superior Occipital Gyrus    | 19, 39             | 385 / 326   | 4.4 (-33, -76, 31) / 6.3 (34, -85, 22)   | 0.43 / 0.61 |
| <b><i>Basal Ganglia</i></b> |                    |             |                                          |             |
| Clastrum                    | *                  | 326 / 296   | 7.0 (-33, -23, 8) / 6.2 (34, 0, 8)       | 0.68 / 0.60 |
| Caudate                     | *                  | 59 / 89     | 4.4 (-36, -27, -6) / 4.4 (6, 11, -4)     | 0.43 / 0.43 |
| Lentiform Nucleus           | *                  | 0 / 30      | - / 3.7 (30, -20, 9)                     | - / 0.36    |
| <b><i>Thalamus</i></b>      |                    |             |                                          |             |
|                             | *                  | 859 / 1096  | 6.1 (-3, -10, 2) / 6.1 (3, -10, 1)       | 0.59 / 0.59 |
| <b><i>Cerebellum</i></b>    |                    |             |                                          |             |
| Culmen                      | *                  | 3319 / 3556 | 6.6 (-22, -40, -11) / 6.1 (33, -52, -19) | 0.64 / 0.59 |
| Declive                     | *                  | 3200 / 3289 | 6.1 (-25, -65, -12) / 6.1 (27, -65, -11) | 0.59 / 0.59 |
| Inferior Semi-Lunar         | *                  | 1511 / 1215 | 5.0 (-22, -69, -42) / 5.2 (25, -78, -40) | 0.49 / 0.50 |
| Uvula                       | *                  | 978 / 919   | 4.5 (-4, -64, -33) / 4.9 (6, -70, -32)   | 0.44 / 0.48 |
| Pyramis                     | *                  | 504 / 859   | 3.9 (0, -67, -24) / 4.8 (21, -75, -34)   | 0.38 / 0.47 |
| Cerebellar Tonsil           | *                  | 326 / 770   | 4.2 (-28, -38, -33) / 5.0 (31, -40, -33) | 0.41 / 0.49 |
| Tuber                       | *                  | 296 / 533   | 4.3 (-36, -61, -23) / 4.7 (39, -61, -23) | 0.42 / 0.46 |
| Declive of Vermis           | *                  | 89 / 119    | 5.6 (-1, -69, -15) / 6.0 (1, -69, -13)   | 0.54 / 0.58 |
| Uvula of Vermis             | *                  | 89 / 59     | 4.5 (-1, -67, -33) / 4.5 (1, -64, -33)   | 0.44 / 0.44 |
| Culmen of Vermis            | *                  | 30 / 89     | 4.7 (-1, -66, -8) / 4.9 (6, -61, -1)     | 0.46 / 0.48 |
| Pyramis of Vermis           | *                  | 59 / 59     | 4.5 (-1, -71, -28) / 4.7 (1, -71, -30)   | 0.44 / 0.46 |
| Fastigium                   | *                  | 30 / 59     | 3.3 (-10, -61, -21) / 4.4 (7, -56, -19)  | 0.32 / 0.43 |
| Nodule                      | *                  | 0 / 59      | - / 3.6 (1, -48, -29)                    | - / 0.35    |
| Tuber of Vermis             | *                  | 30 / 30     | 4.4 (-3, -71, -24) / 4.7 (1, -71, -25)   | 0.43 / 0.46 |

| Healthy –<br>Biotype3<br>Probands |                          |                      |             |                                        |             |
|-----------------------------------|--------------------------|----------------------|-------------|----------------------------------------|-------------|
|                                   |                          |                      |             |                                        |             |
|                                   | <b><i>Frontal</i></b>    |                      |             |                                        |             |
|                                   | Medial Frontal Gyrus     | 6, 8, 9, 10, 11, 25, | 2578 / 3615 | 5.5 (-3, 49, -4) / 6.3 (3, 37, -13)    | 0.51 / 0.58 |
|                                   | Inferior Frontal Gyrus   | 9, 10, 13, 44, 45,   | 1600 / 3141 | 5.2 (-39, 22, -4) / 6.0 (43, 19, -3)   | 0.48 / 0.55 |
|                                   | Middle Frontal Gyrus     | 9, 10, 11, 46        | 1689 / 2015 | 4.9 (-30, 34, -14) / 4.8 (43, 13, 27)  | 0.45 / 0.44 |
|                                   | Superior Frontal Gyrus   | 9, 10, 11            | 1156 / 1007 | 5.1 (-27, 52, -4) / 4.7 (13, 55, -8)   | 0.47 / 0.43 |
|                                   | Precentral Gyrus         | 6, 9, 13, 43, 44     | 267 / 859   | 4.1 (-55, -10, 10) / 6.3 (50, -8, 6)   | 0.38 / 0.58 |
|                                   | Paracentral Lobule       | 31                   | 148 / 237   | 4.1 (-6, -17, 44) / 5.3 (7, -15, 44)   | 0.38 / 0.49 |
|                                   | Orbital Gyrus            | 11                   | 59 / 89     | 4.6 (-3, 41, -21) / 5.0 (3, 41, -20)   | 0.42 / 0.46 |
|                                   | Rectal Gyrus             | 11                   | 30 / 89     | 3.9 (-4, 35, -21) / 5.3 (3, 35, -19)   | 0.36 / 0.49 |
|                                   | <b><i>Cingulate</i></b>  |                      |             |                                        |             |
|                                   | Cingulate Gyrus          | 23, 24, 31, 32       | 2489 / 3022 | 5.0 (-9, 18, 34) / 6.2 (10, -14, 41)   | 0.46 / 0.57 |
|                                   | Anterior Cingulate       | 10, 24, 25, 32       | 1719 / 1333 | 5.3 (-4, 52, -1) / 5.8 (3, 47, 0)      | 0.49 / 0.53 |
|                                   | Posterior Cingulate      | 23, 29, 30, 31       | 563 / 1037  | 4.6 (-1, -60, 17) / 5.2 (3, -60, 17)   | 0.42 / 0.48 |
|                                   | <b><i>Insula</i></b>     |                      |             |                                        |             |
|                                   |                          | 13, 22, 47           | 1926 / 2193 | 4.7 (-33, 22, 2) / 6.3 (42, 3, 4)      | 0.43 / 0.58 |
|                                   | <b><i>Temporal</i></b>   |                      |             |                                        |             |
|                                   | Superior Temporal Gyrus  | 13, 21, 22, 38, 41,  | 1926 / 4148 | 4.9 (-55, -8, 6) / 6.5 (50, -6, 3)     | 0.45 / 0.60 |
|                                   | Parahippocampal Gyrus    | 19, 28, 30, 34, 35,  | 1422 / 1778 | 4.9 (-28, 4, -17) / 5.1 (25, 5, -17)   | 0.45 / 0.47 |
|                                   | Middle Temporal Gyrus    | 21, 22, 38           | 30 / 1541   | 3.2 (-50, 6, -23) / 5.1 (49, 0, -26)   | 0.30 / 0.47 |
|                                   | Uncus                    | 20, 28, 34, 36       | 267 / 741   | 4.5 (-28, 1, -19) / 5.8 (28, 5, -19)   | 0.42 / 0.53 |
|                                   | Transverse Temporal      | 41, 42               | 326 / 148   | 4.5 (-50, -24, 11) / 5.0 (56, -18, 12) | 0.42 / 0.46 |
|                                   | Inferior Temporal Gyrus  | 20, 21               | 0 / 207     | - / 4.1 (49, -3, -29)                  | - / 0.38    |
|                                   | Fusiform Gyrus           | 20                   | 0 / 89      | - / 4.4 (49, -3, -24)                  | - / 0.41    |
|                                   | <b><i>Parietal</i></b>   |                      |             |                                        |             |
|                                   | Precuneus                | 23, 31               | 444 / 681   | 4.5 (0, -64, 24) / 5.0 (1, -63, 20)    | 0.42 / 0.46 |
|                                   | Inferior Parietal Lobule | 40                   | 444 / 178   | 4.3 (-52, -43, 23) / 3.8 (53, -27, 23) | 0.40 / 0.35 |
|                                   | Postcentral Gyrus        | 40, 43               | 89 / 178    | 3.9 (-53, -9, 16) / 4.2 (56, -24, 14)  | 0.36 / 0.39 |
|                                   | Supramarginal Gyrus      | 40                   | 30 / 30     | 3.4 (-55, -45, 23) / 3.9 (55, -46, 22) | 0.31 / 0.36 |

***Occipital***

|               |                |           |                                       |             |
|---------------|----------------|-----------|---------------------------------------|-------------|
| Lingual Gyrus | 17, 18, 19, 30 | 237 / 859 | 3.5 (-3, -81, 3) / 4.8 (13, -51, 4)   | 0.32 / 0.44 |
| Cuneus        | 17, 18, 23, 30 | 593 / 622 | 3.8 (-13, -69, 16) / 4.7 (13, -59, 8) | 0.35 / 0.43 |

***Basal Ganglia***

|                   |   |          |                                        |             |
|-------------------|---|----------|----------------------------------------|-------------|
| Clastrum          | * | 178 / 89 | 4.0 (-33, 6, 4) / 3.7 (30, 17, -1)     | 0.37 / 0.34 |
| Caudate           | * | 30 / 30  | 3.6 (-33, -25, -6) / 3.4 (34, -25, -3) | 0.33 / 0.31 |
| Lentiform Nucleus | * | 0 / 30   | - / 3.6 (21, -9, -6)                   | - / 0.33    |

***Cerebellum***

|        |   |          |                                         |             |
|--------|---|----------|-----------------------------------------|-------------|
| Culmen | * | 30 / 237 | 3.4 (-19, -28, -15) / 3.9 (18, -40, -7) | 0.31 / 0.36 |
|--------|---|----------|-----------------------------------------|-------------|

**Gray matter volume reductions in Biotype relative groups vs. healthy subjects****Healthy –  
Biotype1  
Relatives*****Frontal***

|                        |            |            |                                       |             |
|------------------------|------------|------------|---------------------------------------|-------------|
| Medial Frontal Gyrus   | 10, 11, 25 | 1185 / 444 | 4.4 (-3, 26, -13) / 4.4 (3, 31, -13)  | 0.45 / 0.45 |
| Inferior Frontal Gyrus | 11, 13, 47 | 89 / 1067  | 3.9 (-28, 8, -18) / 4.4 (25, 18, -16) | 0.40 / 0.45 |
| Superior Frontal Gyrus | 10         | 237 / 0    | 3.7 (-9, 59, -7) / -                  | 0.38 / -    |
| Middle Frontal Gyrus   | 11         | 30 / 30    | 3.2 (-42, 22, 22) / 3.5 (25, 24, -16) | 0.30 / 0.32 |

***Cingulate***

|                     |                    |            |                                       |             |
|---------------------|--------------------|------------|---------------------------------------|-------------|
| Anterior Cingulate  | 10, 24, 25, 32     | 1511 / 356 | 4.7 (-3, 29, -10) / 4.1 (1, 19, -7)   | 0.43 / 0.38 |
| Posterior Cingulate | 18, 23, 29, 30, 31 | 919 / 770  | 4.2 (-19, -59, 11) / 4.5 (9, -56, 10) | 0.39 / 0.42 |
| Cingulate Gyrus     | 24, 31, 32         | 919 / 296  | 4.8 (-13, -10, 42) / 4.0 (9, -6, 35)  | 0.44 / 0.37 |

***Insula***

|    |         |                     |          |
|----|---------|---------------------|----------|
| 13 | 444 / 0 | 3.7 (-34, 8, 7) / - | 0.34 / - |
|----|---------|---------------------|----------|

***Temporal***

|                         |                     |             |                                          |             |
|-------------------------|---------------------|-------------|------------------------------------------|-------------|
| Parahippocampal Gyrus   | 28, 30, 34, 35, 36, | 1600 / 1837 | 5.9 (-30, -13, -22) / 5.1 (31, -13, -22) | 0.54 / 0.47 |
| Middle Temporal Gyrus   | 20, 21, 38          | 978 / 30    | 5.1 (-42, 2, -23) / 3.2 (49, -11, -11)   | 0.47 / 0.30 |
| Uncus                   | 20, 28, 36          | 593 / 385   | 4.6 (-30, -1, -21) / 3.8 (22, -7, -22)   | 0.42 / 0.35 |
| Superior Temporal Gyrus | 38                  | 593 / 148   | 4.8 (-45, 5, -22) / 3.9 (33, 4, -17)     | 0.44 / 0.36 |
| Fusiform Gyrus          | 20, 37              | 30 / 178    | 4.4 (-42, -3, -23) / 4.1 (27, -34, -15)  | 0.41 / 0.38 |

|                                             |                             |                          |                    |                                          |                                         |             |
|---------------------------------------------|-----------------------------|--------------------------|--------------------|------------------------------------------|-----------------------------------------|-------------|
|                                             | Inferior Temporal Gyrus     | *                        | 59 / 0             | 3.7 (-33, -1, -42) / -                   | 0.38 / -                                |             |
|                                             | <b><i>Parietal</i></b>      |                          |                    |                                          |                                         |             |
|                                             | Precuneus                   | 31                       | 30 / 30            | 3.1 (-10, -65, 18) / 3.5 (6, -73, 22)    | 0.31 / 0.36                             |             |
|                                             | <b><i>Occipital</i></b>     |                          |                    |                                          |                                         |             |
|                                             | Cuneus                      | 18, 30                   | 504 / 504          | 4.3 (-16, -71, 16) / 4.8 (15, -62, 6)    | 0.44 / 0.49                             |             |
|                                             | Lingual Gyrus               | 18, 19                   | 178 / 415          | 3.6 (-13, -52, 5) / 4.4 (15, -58, 4)     | 0.37 / 0.45                             |             |
|                                             | <b><i>Basal Ganglia</i></b> |                          |                    |                                          |                                         |             |
|                                             | Clastrum                    | *                        | 30 / 0             | 3.3 (-30, 3, 11) / -                     | 0.33 / -                                |             |
|                                             | <b><i>Cerebellum</i></b>    |                          |                    |                                          |                                         |             |
|                                             | Culmen                      | *                        | 30 / 119           | 3.2 (-19, -33, -12) / 3.5 (27, -32, -19) | 0.32 / 0.36                             |             |
| <b>Healthy –<br/>Biotype2<br/>Relatives</b> | <b><i>Cingulate</i></b>     |                          |                    |                                          |                                         |             |
|                                             |                             | Posterior Cingulate      | 23, 29, 30, 31     | 0 / 770                                  | - / 4.2 (10, -58, 10)                   | - / 0.40    |
|                                             |                             | <b><i>Temporal</i></b>   |                    |                                          |                                         |             |
|                                             |                             | Parahippocampal Gyrus    | 19, 30, 35, 36, 37 | 59 / 652                                 | 3.6 (-24, -36, -13) / 4.7 (21, -56, -6) | 0.34 / 0.45 |
|                                             |                             | Fusiform Gyrus           | 19, 20, 37         | 504 / 415                                | 4.2 (-43, -56, -17) / 4.5 (24, -63, -7) | 0.40 / 0.43 |
|                                             |                             | Uncus                    | 20                 | 0 / 59                                   | - / 3.6 (34, -19, -27)                  | - / 0.34    |
|                                             |                             | <b><i>Parietal</i></b>   |                    |                                          |                                         |             |
|                                             |                             | Precuneus                | *                  | 0 / 30                                   | - / 3.2 (6, -62, 18)                    | - / 0.30    |
|                                             |                             | <b><i>Occipital</i></b>  |                    |                                          |                                         |             |
|                                             |                             | Lingual Gyrus            | 18, 19             | 267 / 711                                | 4.2 (-9, -78, -9) / 4.6 (21, -60, -6)   | 0.40 / 0.44 |
|                                             |                             | Cuneus                   | 18, 30             | 0 / 119                                  | - / 4.1 (13, -59, 7)                    | - / 0.39    |
|                                             |                             | <b><i>Cerebellum</i></b> |                    |                                          |                                         |             |
|                                             |                             | Declive                  | *                  | 2222 / 2607                              | 4.4 (-9, -58, -17) / 4.4 (9, -65, -13)  | 0.42 / 0.42 |
|                                             |                             | Culmen                   | *                  | 1096 / 2281                              | 4.4 (-9, -53, -18) / 4.8 (25, -36, -16) | 0.42 / 0.46 |

|                     |   |           |                                          |             |
|---------------------|---|-----------|------------------------------------------|-------------|
| Pyramis             | * | 444 / 652 | 4.1 (-24, -74, -28) / 3.9 (25, -70, -27) | 0.39 / 0.37 |
| Uvula               | * | 296 / 652 | 3.9 (-22, -77, -25) / 4.2 (25, -73, -24) | 0.37 / 0.40 |
| Inferior Semi-Lunar | * | 30 / 652  | 3.1 (-39, -63, -36) / 3.7 (31, -64, -35) | 0.30 / 0.35 |
| Tuber               | * | 356 / 504 | 4.0 (-27, -77, -28) / 3.9 (31, -80, -28) | 0.38 / 0.37 |
| Cerebellar Tonsil   | * | 385 / 356 | 3.5 (-43, -56, -35) / 3.6 (27, -66, -33) | 0.33 / 0.34 |
| Declive of Vermis   | * | 89 / 30   | 3.9 (-1, -69, -17) / 3.5 (1, -72, -18)   | 0.37 / 0.33 |
| Culmen of Vermis    | * | 59 / 30   | 3.9 (-3, -66, -8) / 3.9 (3, -66, -8)     | 0.37 / 0.37 |
| Fastigium           | * | 30 / 30   | 3.7 (-7, -61, -20) / 3.5 (10, -49, -20)  | 0.35 / 0.33 |
| Uvula of Vermis     | * | 0 / 30    | - / 3.3 (3, -69, -33)                    | - / 0.31    |

**Healthy –  
Biotype3  
Relatives**

|                         |        |           |                                       |             |
|-------------------------|--------|-----------|---------------------------------------|-------------|
| <b>Frontal</b>          |        |           |                                       |             |
| Inferior Frontal Gyrus  | *      | 0 / 30    | - / 3.6 (28, 7, -15)                  | - / 0.32    |
| <b>Temporal</b>         |        |           |                                       |             |
| Parahippocampal Gyrus   | 28, 34 | 652 / 504 | 4.2 (-28, 2, -18) / 4.4 (28, 3, -18)  | 0.37 / 0.40 |
| Uncus                   | 28, 34 | 178 / 237 | 3.7 (-27, -1, -20) / 3.9 (28, 0, -20) | 0.33 / 0.35 |
| Superior Temporal Gyrus | 38     | 30 / 30   | 3.5 (-31, 5, -18) / 4.0 (31, 6, -18)  | 0.32 / 0.36 |

**Gray matter volume reductions in Biotype relative groups after removing relatives with psychosis-related diagnoses vs. healthy subjects**

**Healthy –  
Biotype1  
Relatives  
(All-Psychosis)**

|                         |            |          |                         |          |
|-------------------------|------------|----------|-------------------------|----------|
| <b>Temporal</b>         |            |          |                         |          |
| Parahippocampal Gyrus   | 28, 34, 35 | 1007 / 0 | 4.5 (-19, -18, -17) / - | 0.46 / - |
| Uncus                   | *          | 119 / 0  | 3.7 (-30, 0, -20) / -   | 0.38 / - |
| Superior Temporal Gyrus | 38         | 89 / 0   | 3.4 (-30, 7, -15) / -   | 0.35 / - |

**Healthy –  
Biotype2  
Relatives  
(All-Psychosis)**

|                       |        |         |                        |          |
|-----------------------|--------|---------|------------------------|----------|
| <b>Temporal</b>       |        |         |                        |          |
| Parahippocampal Gyrus | 19, 36 | 0 / 119 | - / 3.6 (19, -56, -6)  | - / 0.34 |
| Fusiform Gyrus        | 37     | 0 / 59  | - / 3.3 (28, -36, -15) | - / 0.31 |
| <b>Occipital</b>      |        |         |                        |          |
| Lingual Gyrus         | 18, 19 | 0 / 148 | - / 3.5 (13, -58, 0)   | - / 0.33 |

**Cerebellum**



|                                                                 |                         |            |           |                                      |             |
|-----------------------------------------------------------------|-------------------------|------------|-----------|--------------------------------------|-------------|
|                                                                 | Culmen                  | *          | 0 / 741   | - / 4.2 (24, -37, -15)               | - / 0.40    |
|                                                                 | Declive                 | *          | 0 / 119   | - / 3.3 (18, -55, -12)               | - / 0.31    |
| <b>Healthy –<br/>Biotype3<br/>Relatives<br/>(All-Psychosis)</b> | <b>Frontal</b>          |            |           |                                      |             |
|                                                                 | Inferior Frontal Gyrus  | *          | 0 / 30    | - / 4.1 (28, 7, -15)                 | - / 0.37    |
|                                                                 | <b>Temporal</b>         |            |           |                                      |             |
|                                                                 | Parahippocampal Gyrus   | 28, 34, 38 | 770 / 741 | 4.8 (-27, 2, -18) / 5.1 (28, 3, -18) | 0.43 / 0.46 |
|                                                                 | Uncus                   | 28, 34     | 207 / 356 | 4.3 (-18, 1, -19) / 4.8 (16, 1, -19) | 0.39 / 0.43 |
|                                                                 | Superior Temporal Gyrus | 38         | 30 / 59   | 3.7 (-33, 2, -18) / 4.6 (31, 6, -18) | 0.33 / 0.41 |

\* Coordinates for peak  $t$  values are reported based of Group ICA for fMRI Toolbox, GIFT1.3i. All outcomes are reported at  $p = .05$ , using FWE cluster-level correction, based on an initial voxel threshold set to  $p = .001$ , uncorrected. † Effect size: Cohen's  $d$  derived from  $t$  distribution statistics =  $t \cdot \{ (n_1 + n_2) / \sqrt{n_1 + n_2 - df} \sqrt{n_1 n_2} \}$  where  $t$  =  $t$  statistic;  $n_1$  and  $n_2$  = sample sizes;  $df$  = degree of freedom; 0.2 = small, 0.5 = medium, 0.8 = large

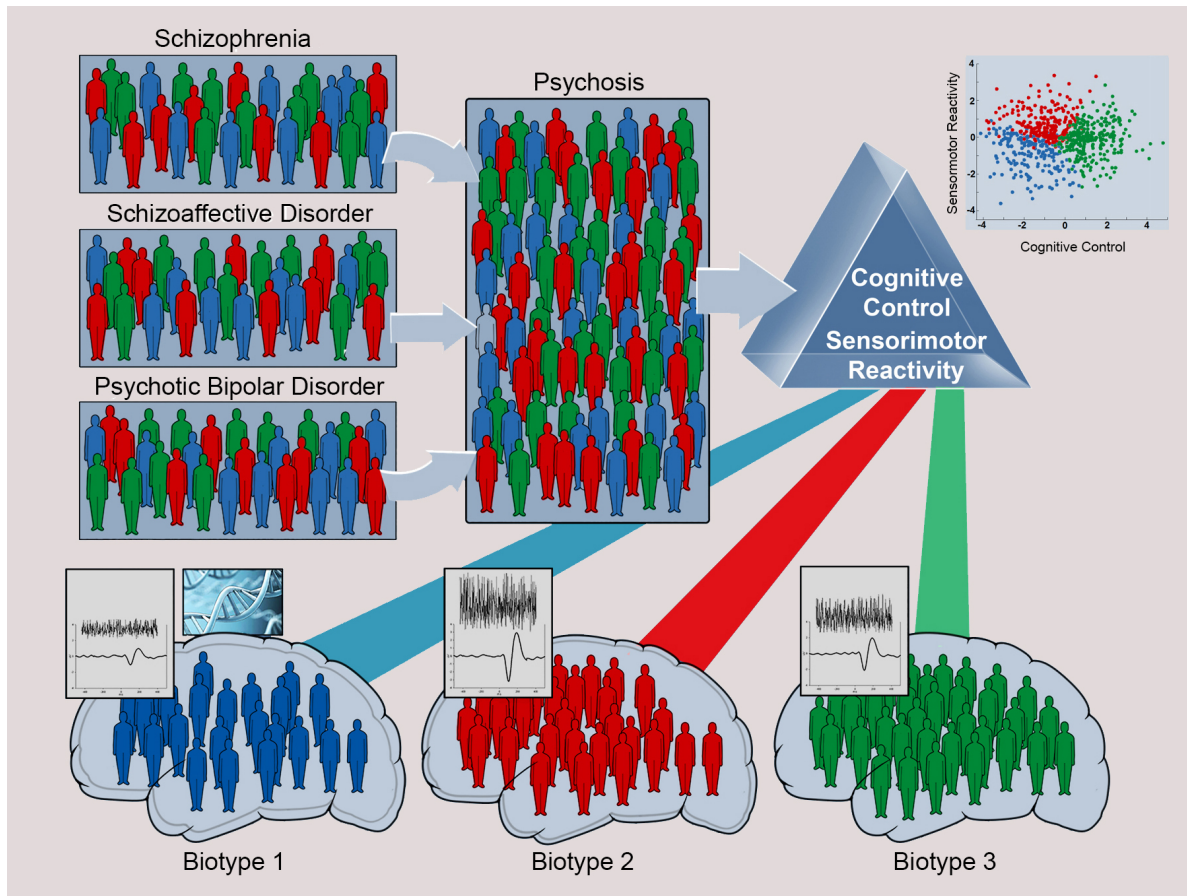

Supplementary Figure 1: Creating Neurobiologically Distinct Psychosis Biotypes. Psychosis is a defining characteristic of Schizophrenia, Schizoaffective Disorder, and Psychotic Bipolar Disorder, all pathophysiologically complex syndromes. These clinical syndromes were not distinguishable by our extensive biomarker panel. Psychosis subjects, therefore, were combined into a single group, independent of DSM diagnosis, and biomarker variables were used to define subgroups with shared neurobiological variance. Two biomarker dimensions, ‘cognitive control’ and ‘sensorimotor reactivity’, provided a means for creating biomarker-defined subgroups (called psychosis *Biotypes*). Biotype-1, -2, and -3, had distinctive neurobiological characteristics, including on variables not used in their definition (called external validators). Biotype-1 cases were fewest in number, had low grey matter volume, significant neurobiological impairment, high numbers of clinically affected relatives, and poor psychosocial functioning. Biotype-2 cases had high neural reactivity, modestly small grey matter volumes, and more modest but still significant cognitive impairment. Biotype-3 cases were most numerous, had nearly normal cognition and neural reactivity, lowest numbers of clinically affected relatives, and the best psychosocial functioning. Neural characteristics as they segregate in these groups could be the basis for distinct molecular and therapeutic targets.

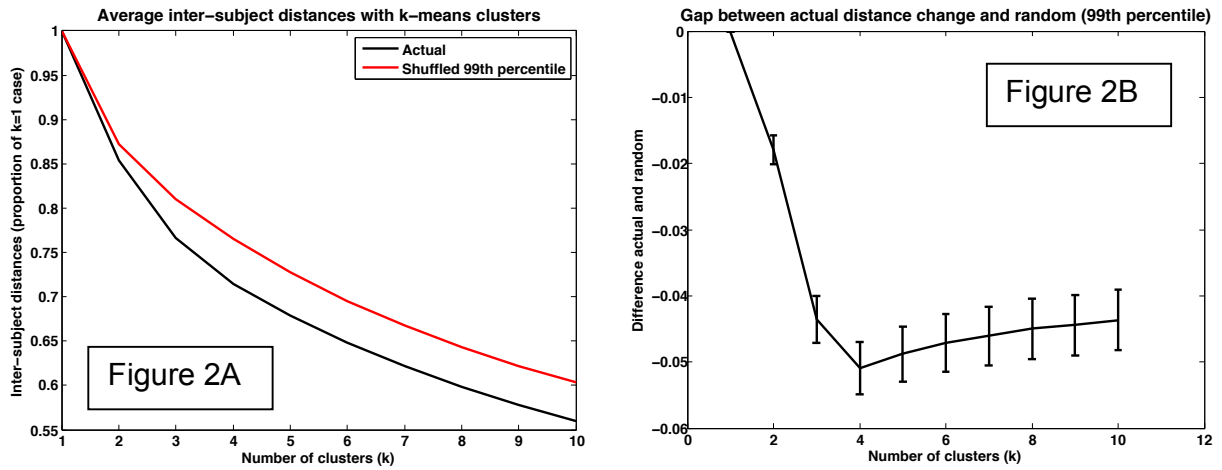

Supplementary Figure 2: Gap Statistic Results. The gap statistic provided one means for estimating the number of clusters in our data prior to implementing the *k*-means algorithm. Figure 1A shows differences between the pooled within-cluster sums of squares as a function of the number of requested clusters for the actual (black line) and null (red line) distributions. Functions are plotted for each distribution as a proportion of the 1 cluster (no subgroups) case. Figure 1B shows the gap function (the difference between the actual and null distribution functions), including the standard errors of the within cluster sums of squares at each requested cluster number. Although the peak was at 4 clusters, that gap value did not significantly differ from the 3-cluster case, so the latter most parsimoniously described the number of subgroups given or data.

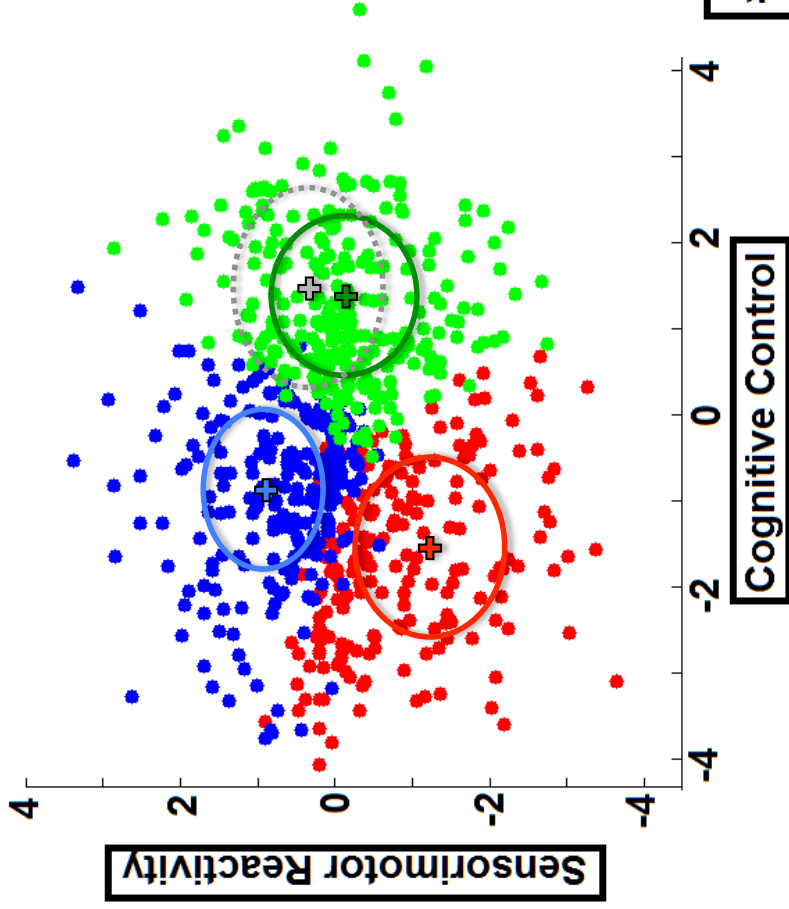

Supplementary Figure 3a: Sensorimotor Reactivity by Cognitive Control as a Function of Biotype. Each dot indicates the location of an individual in this bivariate biomarker space. (red=Biotype-1, blue=Biotype-2, green=Biotype-3). The color coded crosses and ellipsoids show the centroids and  $\pm 1$  SD for each Biotype. The gray cross and ellipse show the same values for the healthy group

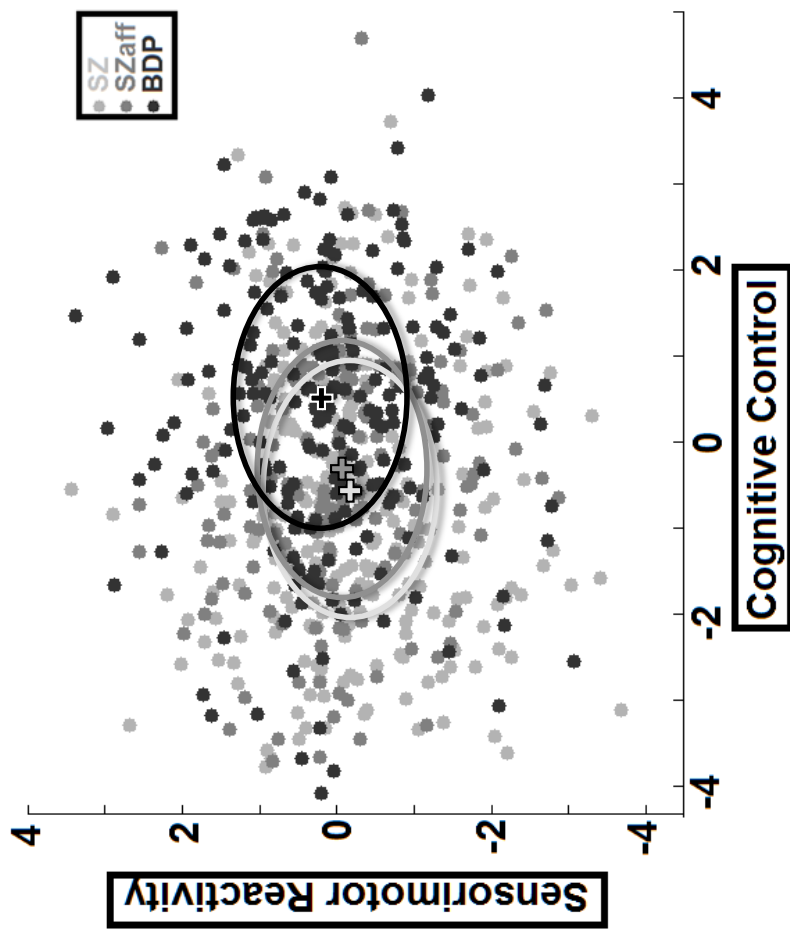

Supplementary Figure 3b: Sensorimotor Reactivity by Cognitive Control as a Function of DSM diagnosis. Each dot indicates the location of an individual in this bivariate biomarker space. (light gray=schizophrenia (SZ), medium gray=schizoaffective disorder (SZAff), black=bipolar disorder with psychosis (BDP)). The gray scale coded crosses and ellipsoids show the centroids and  $\pm 1$  SD for each DSM Diagnosis.

**Supplementary Figure 4: Relative Group Comparisons on Discriminant Functions.** Comparisons between healthy persons and biological relatives as a function of their probands' Biotype on cognitive control and sensorimotor reactivity. Relatives are subdivided within Biotype according to their clinical diagnoses (all relatives, then relatives minus psychosis cases, then relatives minus psychosis and personality disorder (PD) cases). There are three important points: (i) Clinically affected relatives were more abnormal, excluding them did not eliminate relatives' differences from healthy persons; (ii) Biotype-1, and to a lesser extent Biotype-2, relatives seem to possess constitutional predisposition to cognitive control deviation; (iii) Biotype-3 relatives appear largely normal on these functions.

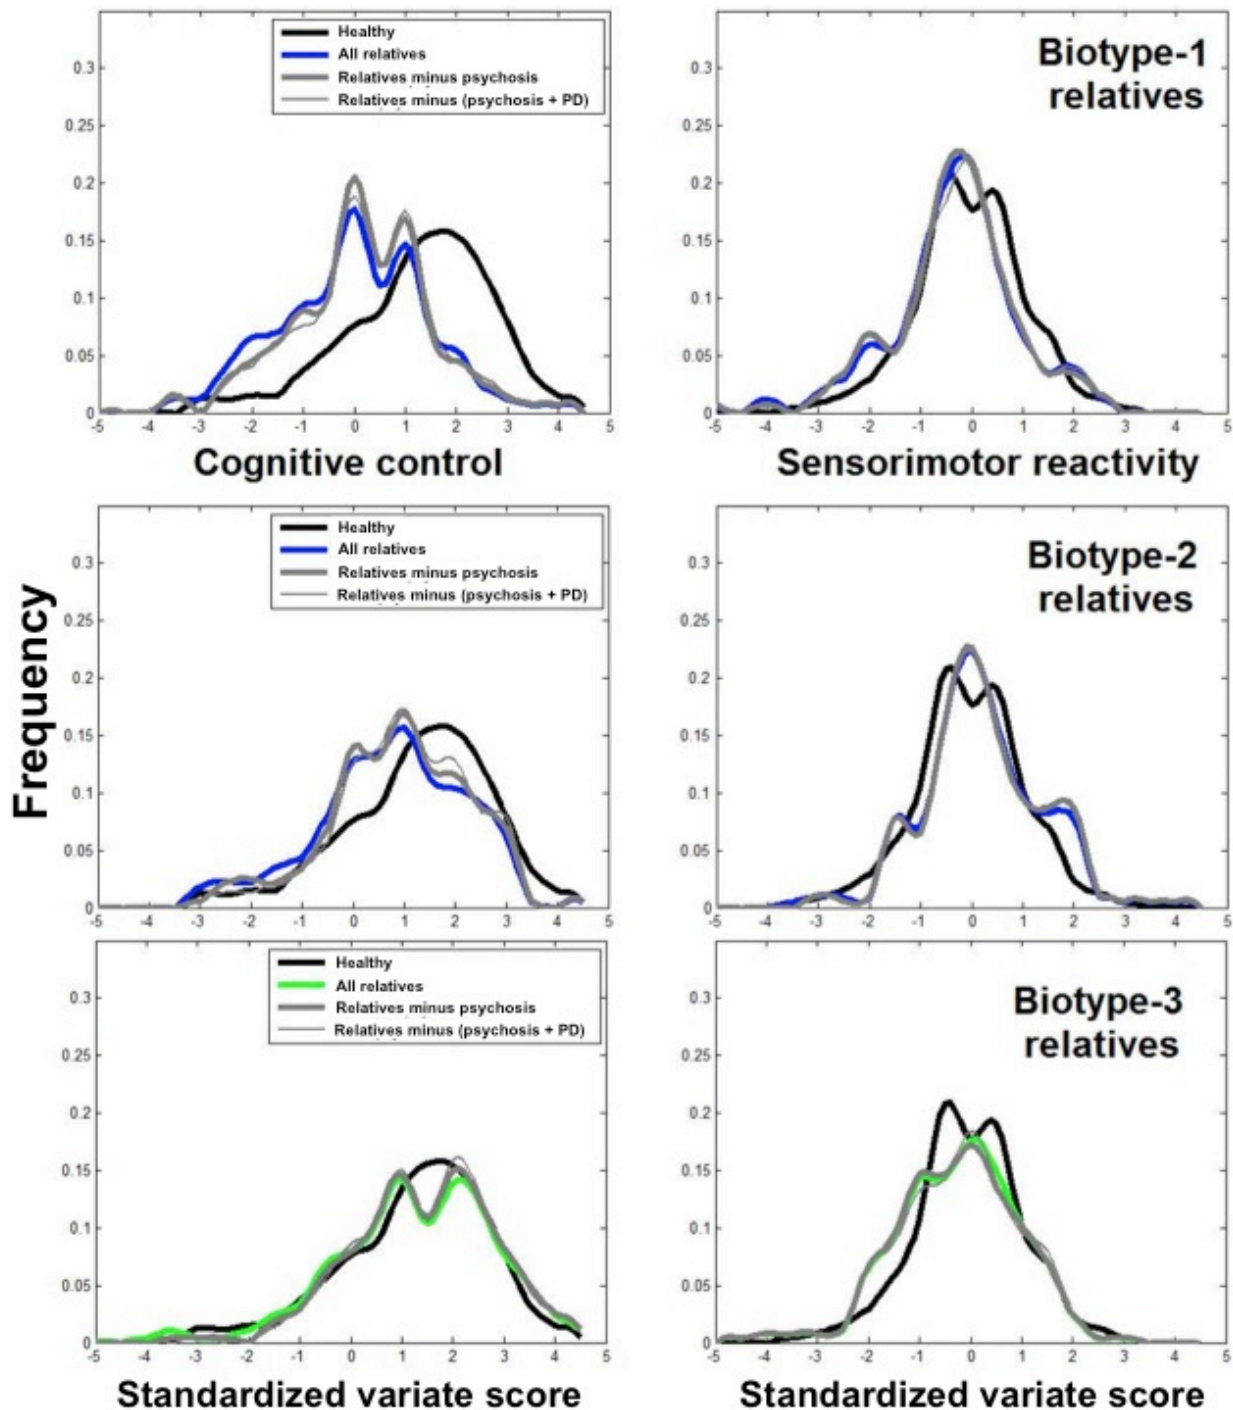

## ***Subjects***

Persons meeting a DSM-IV-TR (1) diagnosis of schizophrenia, schizoaffective disorder, or bipolar disorder with psychosis were rated on the Positive and Negative Syndrome (2), Young Mania Rating (3), Montgomery-Asberg Depression Rating (4), Schizo-Bipolar (5), and Birchwood Social Functioning (6) scales. They were also rated on the Hollingshead Index of Social Position (7).

## ***Laboratory tasks***

Brief Assessment of Cognition in Schizophrenia. This battery is a widely used test of global neuropsychological function. It covers multiple cognitive domains (Verbal Memory, Processing Speed, Reasoning and Problem Solving, Working Memory), although a global neuropsychological functioning composite score integrating over these domains yields the best measure of psychosis-related cognitive deviation (8); this measure was used in Biotype construction.

Pro- and Anti-Saccade Tasks. Eye movement recordings were analyzed using established methods (9). Saccade latency (time from peripheral cue onset to saccade onset) and percentage of error responses were recorded for each condition. The prosaccade task consisted of 3 blocks of 32 trials in which the timing of the central fixation crosshair was experimentally manipulated to extinguish simultaneously with (no gap condition), 200 ms before (gap condition) or 200 ms after (overlap condition) peripheral cue appearance. Subjects were instructed to make a saccade to the peripheral cue when it appeared. The antisaccade task consisted of 4 blocks of 20 overlap trials. The overlap condition was used because it is most sensitive to relatives' deficits (10). Subjects were instructed to not look to the peripheral cue but saccade to the mirrored location in the opposite visual field.

Stop Signal Task. Trials begin with a central fixation cross after which subjects were shown a Go cue to the left or right. On 40% of trials a Stop Signal was presented at central fixation (with delays between 50 and 282 ms after Go cue onset). Participants were to respond to the Go cue with a button press as quickly as possible unless they encountered the Stop Signal. Strategic slowing (difference between response latencies on baseline Go trials, a block of trials not interspersed with Stop Signal trials, and Go trials during Stop Signal performance) and proportion of Stop Signal errors were used in Biotype construction (see (11) for complete task and analysis details). All trials began with the presentation of a white central fixation crosshair for a random interval of 750-1500ms followed by a green circle (the Go cue) to the right or left of center for 650ms. On 40% of trials, a Stop Signal (red stop sign) was presented at the location of the central fixation crosshair at delays varying between 50-282ms after the Go stimulus was shown. The ordering of Stop Signal delays and occurrences of Stop trials varied pseudorandomly. Participants were instructed to respond as quickly and accurately as possible with a button press. The task was administered over four blocks of 63 trials each (38 Go; 25 Stop). A baseline task consisting of 50 consecutive Go trials, evenly and randomly distributed to cues on the left and right side of the screen, was administered to assess baseline reaction time to Go cues.

Auditory Paired-Stimuli and Oddball Evoked Brain Responses. For the paired stimuli task, subjects listened to 150 binaural broadband auditory click pairs (500-ms interclick interval) occurring an average of every 9.5s. For the oddball task, subjects listened to 567 standard (1000Hz) and 100 target (1500Hz) tones presented in pseudorandom order (1300ms inter-trial interval). Subjects were asked to press a button when a target was detected.

Electroencephalography data pre-processing was completed using previously published protocols (12,13). To maximize use of available spatial, temporal, and oscillatory information in the evoked auditory response, a frequency-wise principal component analysis of evoked power was first conducted across all subjects to define frequency bands for analysis: (a) LOW, 4–16 Hz; (b) BETA, 17–33 Hz; and (c) GAMMA, 34–55 Hz. Spatial principal component analysis (12,13) was completed on the broadband grand-averaged event-related potential waveforms (for traditional event-related potential analyses) and then once for each frequency band to define specific neural oscillatory activities. “Virtual sensors” were constructed based on the principal component analysis outcomes for the broadband event-related potentials and each frequency band (12,13). These analyses were performed separately for the paired-stimuli and oddball paradigms. Data from principal components capturing the majority of response variance were then analyzed. Data were analyzed over time (not just at voltage peaks) for both voltage amplitudes and powers in the empirically defined frequency bands. For each condition and subject, the individual principal component waveforms were analyzed in 10ms bins after adjusting for age effects (12,13,14). For each time bin, for each principal component, a one-way analysis of variance was conducted comparing DSM-diagnosed proband groups and healthy individuals, adjusting for multiple comparisons (12,13). The outcome was 31 electroencephalography variables in both time-voltage and time-frequency space that differentiated psychosis probands and healthy persons (see Table 2), and these variables were used in Biotype construction.

MRI acquisition and Voxel-Based Morphometry. T1-weighted Magnetization Prepared RAPid Gradient Echo (MPRAGE) images using the Alzheimer's Disease Neuroimaging Initiative (ADNI) protocol (<http://www.loni.ucla.edu/ADNI/Research/Cores/>),



with sequence parameters standardized across sites. Images were processed in MATLAB2013a/SPM8/VBM8/DARTEL following standard steps. Modulated grey matter segments were smoothed with 8mm isotropic Gaussian kernel before group-level statistics (see (15) for complete details). Voxel-wise grey matter volume between-group differences were examined using full factorial design in SPM8 (analysis of covariance followed by pairwise  $t$ -contrasts), adjusted for site, age, sex, and handedness; correction for individual brain size was done during DARTEL segmentation/normalization step. To control for multiple testing, a cluster-level correction was employed with  $p = .05$  FWE-R [Family Wise Error based on random field theory (23)], using an initial cluster-defining threshold of  $p = .001$ , uncorrected. Regional volume reduction analyses were based on Group ICA for fMRI Toolbox, GIFT1.3i, [www.sourceforge.net](http://www.sourceforge.net)) (24). Effect sizes for regional between-group grey matter volume differences were calculated using Cohen's  $d$  derived from  $t$  distribution statistics, similar to (25).

### ***Medication and clinical effects on biomarkers***

Most probands (>90%) and some relatives, were medicated, some with more than one agent, including mood stabilizers, antipsychotic, antidepressants and other psychotropic drugs (see Supplementary Table 2). Antipsychotic dose was estimated by chlorpromazine equivalents (16), benztropine (anti-cholinergic) dose, and the presence (vs. absence) of current antipsychotics, mood stabilizers, and antidepressants. For all subjects, medication status, prior history of substance abuse/dependence, and clinical symptom ratings were minimally related to biomarker variables ( $r^2$ 's <0.04 (8,9,11-13,15,17-19)).

### ***Kinship***

Strong claims of traditional genetic heritability in the current sample are problematic given the absence of either monozygotic twin pairs or second-degree relatives (20), so the more conservative term “kinship” was chosen to refer to the degree to which biomarker measures are predicted by family membership. Kinship was assessed in proband-relative pedigrees via  $h^2r$  estimates calculated using SOLAR (Sequential Oligogenic Linkage Analysis Routines (21)). Total phenotypic variance was partitioned into additive polygenic and random environmental components. We assessed effects of age and sex on each phenotype and, when significant, adjusted for their effects in kinship analyses.

### ***Imputation***

The requirement for inclusion in this project was available data on a majority of the biomarker variables. Estimates of missing values were generated via a regression-based multiple imputation method (22) as implemented in SAS PROC MI using all available information from other biomarker variables. Multiple estimates from 1000 iterations were combined to provide final estimates of the missing values. Analyses for integrating data across measures and for generating Biotypes resulted in highly similar results when using imputed data versus when eliminating all cases with missing data.

1. American Psychiatric Association. Diagnostic and statistical manual of mental disorders (4th ed.). Washington DC, American Psychiatric Publishing, 1994.
2. Lançon C, Auquier P, Nayt G, Reine G: Stability of the five-factor structure of the Positive and Negative Syndrome Scale (PANSS). *Schizophr. Res.* 2000; 42:231–239.
3. Young RC, Biggs JT, Ziegler VE, Meyer DA: A rating scale for mania: reliability, validity and sensitivity. *Br. J. Psychiatry* 1978; 133:429-435.

4. Montgomery SA, Asberg MA: A new depression scale designed to be sensitive to change. *Br. J. Psychiatry* 1979; 134:382-389.
5. Keshavan MS, Morris DW, Sweeney JA, Pearlson G, Thaker G, Seidman LJ, Eack SM, Tamminga C: A dimensional approach to the psychosis spectrum between bipolar disorder and schizophrenia: the schizo-bipolar scale. *Schizophr. Res.* 2011; 133:250-254.
6. Birchwood M, Smith J, Cochrane R, Wetton S, Copestake S: The Social Functioning Scale. The development and validation of a new scale of social adjustment for use in family intervention programmes with schizophrenic patients. *Br. J. Psychiatry* 1990; 157:853-859.
7. Hollingshead AA: Four-factor index of social status. New Haven CT, Yale University, Unpublished manuscript, 1975.
8. Hill SK, Reilly JL, Keefe RS, Gold JM, Bishop JR, Gershon ES, Tamminga CA, Pearlson GD, Keshavan MS, Sweeney JA: Neuropsychological impairments in schizophrenia and psychotic bipolar disorder: findings from the Bipolar-Schizophrenia Network on Intermediate Phenotypes (B-SNIP) study. *Am. J. Psychiatry* 2013; 170:1275-1284.
9. Reilly JL, Frankovisch K, Hill S, Gershon ES, Keefe RS, Keshavan MS, Pearlson GD, Tamminga CA, Sweeney JA: Elevated Antisaccade Error Rate as an Intermediate Phenotype for Psychosis Across Diagnostic Categories. *Schizophr. Bull.* 2014; 40:1011-1021.
10. McDowell JE, Myles-Worsley M, Coon H, Byerley W, Clementz BA. Measuring liability for schizophrenia using optimized antisaccade stimulus parameters. *Psychophysiol.* 1999; 36:138-141.

11. Ethridge LE, Soilleux M, Nakonezny PA, Reilly JL, Hill SK, Keefe RSE, Gershon ES, Pearlson GD, Tamminga CA, Keshavan MS, Sweeney JA: Behavioral response inhibition in psychotic disorders: diagnostic specificity, familiarity, and relation to generalized cognitive deficit. *Schizophr. Res.* 2014; 159:491-498.
12. Hamm JP, Ethridge LE, Boutros NN, Keshavan MS, Sweeney JA, Pearlson GD, Tamminga CA, Clementz BA: Diagnostic specificity and familiarity of early versus late evoked potentials to auditory paired stimuli across the schizophrenia-bipolar psychosis spectrum. *Psychophysiol.* 2014; 51:348-357.
13. Ethridge LE, Hamm JP, Pearlson GD, Tamminga CA, Sweeney JA, Keshavan MS, Clementz BA: Event-related potential and time-frequency endophenotypes for schizophrenia and psychotic bipolar disorder. *Biol. Psychiatry* 2015; 77:127-136.
14. Dukart J, Schroeter ML, Mueller K: Alzheimer's Disease Neuroimaging Initiative. Age correction in dementia—matching to a healthy brain. *PLoS One* 2011; 6:e22193.
15. Ivleva EI, Bidesi AS, Keshavan MS, Pearlson GD, Meda SA, Dodig D, Moates AF, Lu H, Frances AN, Tandon N, Schretlen DJ, Sweeney JA, Clementz BA, Tamminga CA: Gray matter volume as an intermediate phenotype for psychosis: Bipolar-Schizophrenia Network on Intermediate Phenotypes (B-SNIP). *Am. J. Psychiatry* 2013; 170:1285-96.
16. Andreasen NC, Pressler M, Nopoulos P, Miller D, Ho BC. Antipsychotic dose equivalents and dose-years: a standardized method for comparing exposure to different drugs. *Biol. Psychiatry* 2010; 67:255-62.
17. Khadka A, Meda SA, Stevens MC, Glahn DC, Calhoun VD, Sweeney JA, Tamminga CA, Keshavan MS, O'Neil K, Schretlen D, Pearlson GD: Is aberrant functional connectivity a psychosis endophenotype? A resting state functional magnetic resonance imaging study. *Biol. Psychiatry* 2013; 74:458-466.

18. Meda SA, Ruaño G, Windemuth A, O'Neil K, Berwise C, Dunn SM, Boccaccio LE, Narayanan B, Kocherla M, Sprooten E, Keshavan MS, Tamminga CA, Sweeney JA, Clementz BA, Calhoun VD, Pearlson GD: Multivariate analysis reveals genetic associations of the resting default mode network in psychotic bipolar disorder and schizophrenia. *Proc. Natl. Acad. Sci. U.S.A.* 2014; 111:E2066-75.
19. Skudlarski P, Schretlen DJ, Thaker GK, Stevens MC, Keshavan MS, Sweeney JA, Tamminga CA, Clementz BA, O'Neil K, Pearlson GD: Diffusion tensor imaging white matter endophenotypes in patients with schizophrenia or psychotic bipolar disorder and their relatives. *Am. J. Psychiatry* 2013; 170:886-898.
20. Kendler KS, Neale MC. "Familiality" or heritability. *Arch. Gen. Psychiatry* 2009; 66:452-453.
21. Almasy L, Blangero J. Multipoint quantitative-trait linkage analysis in general pedigrees. *Am. J. Hum. Genet.* 1998; 62:1198-1211.
22. Rubin DB. *Multiple Imputation for Nonresponse in Surveys.* (J. Wiley & Sons, New York, 1987).
23. Worsley KJ, Evans AC, Marrett S, Neelin P. A three-dimensional statistical analysis for CBF activation studies in human brain. *J Cereb Blood Flow Metab.* 1992;12(6):900-18.
24. Calhoun VD, Adali T, Pearlson GD, Pekar JJ. A method for making group inferences from functional MRI data using independent component analysis. *Hum Brain Mapping* 2001;14(3):140-151.
25. Rosenthal, R. Rosnow, R. L., & Rubin, D. B. (2000) *Contrasts and effect sizes in behavioral research: A correlational approach.* Cambridge, UK: Cambridge University Press.
